# Supplementary material for: Mechanical and permeability properties of porous scaffolds developed by a Voronoi tessellation for bone tissue engineering
Source: Royal Society of Chemistry journal article supplement (doi:10.1039/d2tb01478e), 2022-01-01
Supplement: d2tb01478e1.pdf [file d2tb01478e1.pdf]

## Supporting information

### Mechanical and permeability properties of porous scaffold developed by Voronoi tessellation for bone tissue engineering

Ze Zhao <sup>a</sup>, Junchao Li <sup>a,1</sup>, Dingrou Yao <sup>a</sup>, Yuan Wei <sup>a</sup>

<sup>a</sup> College of Materials Science and Engineering, Chongqing University, Chongqing 400044, China

Corresponding Authors

<sup>1</sup>E-mail address: craneycqu@hotmail.com

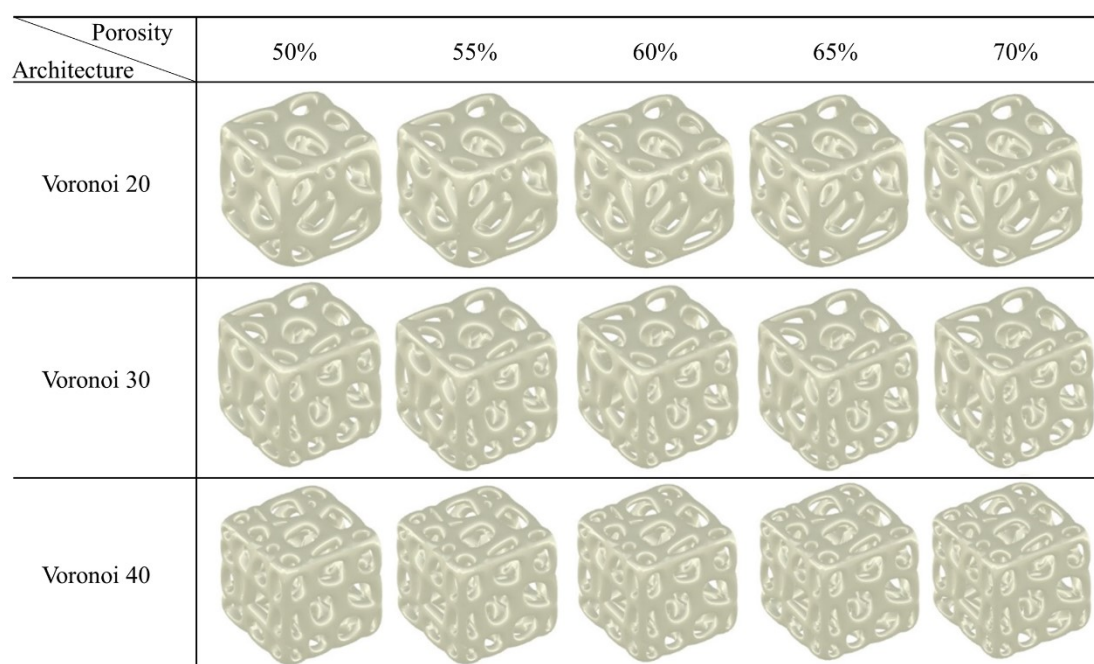

Figure S1. 3D models of the Voronoi porous scaffold.

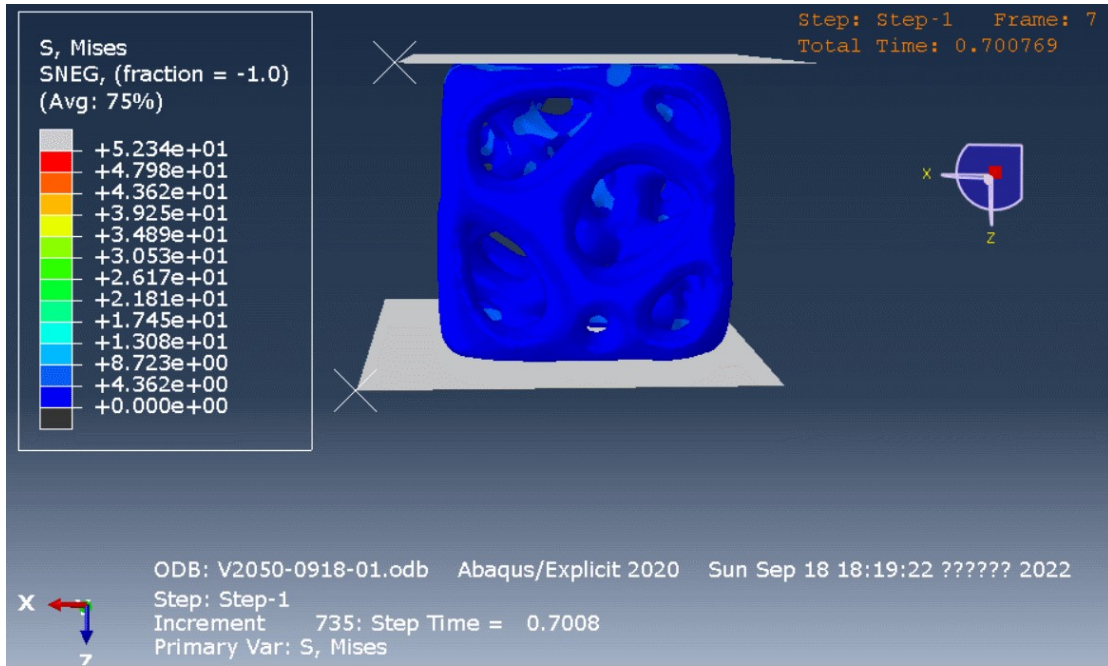

**Figure S2.** Compression animation for V20-50.

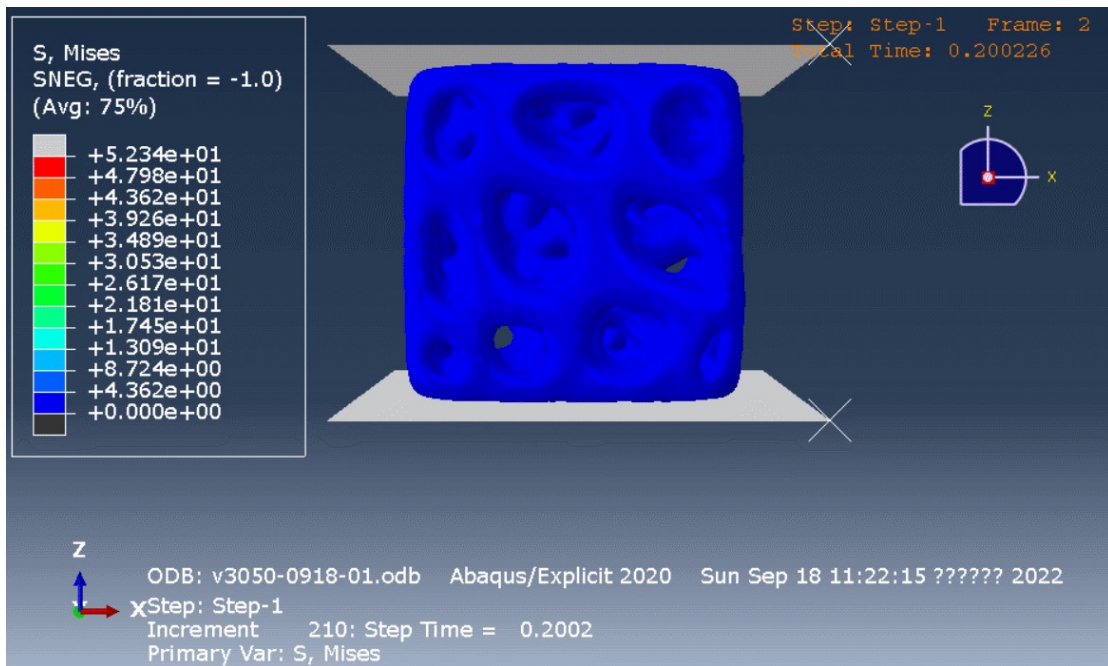

**Figure S3.** Compression animation for V30-50.

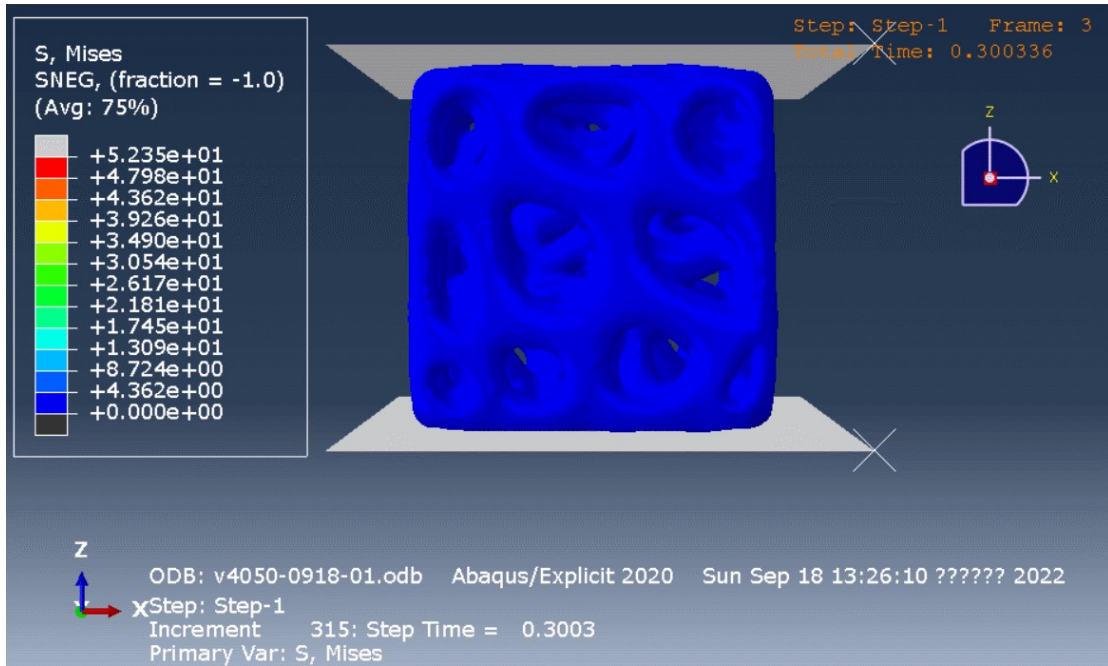

**Figure S4.** Compression animation for V40-50.
